# Supplementary material
Source: MDPI journal article supplement (https://www.mdpi.com/2076-3417/11/6/2880)
Supplement: s1 [file s1]

Archive with 2 entries (2 files):
- PRISMA 2009 checklist-Applicability of CDS in management among patients undergoing cardiac surgery in ICU.pdf
- Supplementary materials.pdf
