# Supplementary material
Source: MDPI journal article supplement (https://www.mdpi.com/2076-3417/11/6/2880)
Supplement: s1 [file s1 › Supplementary materials.pdf]

## Supplementary materials

**Table 1:** Search strategies from each database

| Database | Filtre                                                                                                                                                                  | Search term used                                                                                                                                                                                                                                                                                                                                                                                                                                                                                               | Results | Date       |
|----------|-------------------------------------------------------------------------------------------------------------------------------------------------------------------------|----------------------------------------------------------------------------------------------------------------------------------------------------------------------------------------------------------------------------------------------------------------------------------------------------------------------------------------------------------------------------------------------------------------------------------------------------------------------------------------------------------------|---------|------------|
| PubMed   | Clinical Trial, Review, published in the last 10 years, Humans, English, AIDS, Systematic Reviews, Core clinical journals, MEDLINE, Nursing journals, Adult: 19+ years. | (((((("Intensive Care Unit"[Title/Abstract] OR "intensive care units"[MeSH Terms] OR "critical care"[Title/Abstract] OR "critical care"[MeSH Terms]) AND ("machine learning"[Title/Abstract]) OR "artificial intelligence"[Title/Abstract] OR "artificial intelligence" [MeSH Terms] OR "big data"[Title/Abstract] OR "big data" [MeSH terms]) AND "shock, cardiogenic"[MeSH Terms]) OR "cardiogenic shock"[Title/Abstract] OR "post-cardiac"[Title/Abstract] OR "post cardiac arrest syndrome"[MeSH Terms]))) | 112     | 11/01/2019 |
|          | Clinical Trial, Review, published in the last 10 years, Systematic Reviews, MEDLINE, Core clinical journals, Nursing journals, Adult: 19+ years                         | (((((("intensive care units"[Title/Abstract]) OR "critical care"[Title/Abstract]) AND "machine learning"[Title/Abstract]) OR "artificial intelligence"[Title/Abstract]) OR "big data"[Title/Abstract]) AND "cardiogenic shock"[Title/Abstract]) OR "post cardiac"[Title/Abstract]) OR "cardiac surgery"[Title/Abstract])                                                                                                                                                                                       | 109     | 27/01/2019 |
|          | Clinical Trial, Review, published in the last 10 years, Systematic Reviews, MEDLINE, Core clinical journals, Nursing journals, Adult: 19+ years                         | ((((((((((critical care[Title/Abstract]) OR (critical care[MeSH Terms])) OR (care unit, intensive[MeSH Terms])) OR (intensive care unit[Title/Abstract])) AND (electronic medical record[Title/Abstract])) OR (electronic health records[MeSH Terms])) OR (clinical decision support systems[MeSH Terms])) OR (clinical decision support system[Title/Abstract])) OR (computerized physician order entry[Title/Abstract])) OR (computerized physician order entry system[MeSH Terms])) OR                      | 69      | 11/01/2019 |

|                |                                                                                                                                                                                                                                                               |                                                                                                                                                                                                                                                                    |     |            |
|----------------|---------------------------------------------------------------------------------------------------------------------------------------------------------------------------------------------------------------------------------------------------------------|--------------------------------------------------------------------------------------------------------------------------------------------------------------------------------------------------------------------------------------------------------------------|-----|------------|
|                |                                                                                                                                                                                                                                                               | (database management system[MeSH Terms])) OR (database[Title/Abstract])) AND (cardiogenic shock[Title/Abstract])) OR (cardiogenic shock[MeSH Terms])) OR (post-cardiac arrest syndrome[MeSH Terms])) OR (post-cardiac[Title/Abstract])                             |     |            |
| Web of Science |                                                                                                                                                                                                                                                               | TS=(("intensive care units" OR "critical care") AND ("machine learning" OR "artificial intelligence" OR "big data") AND ("cardiogenic shock" OR "post cardiac" OR "cardiac surgery"))                                                                              | 6   | 17/01/2019 |
|                |                                                                                                                                                                                                                                                               | TS=(("intensive care units" OR "critical care") AND ("Electronic Medical Record " OR "Computerized Medical Record" OR "big data") AND ("cardiogenic shock" OR "post cardiac" OR "cardiac surgery"))                                                                | 17  | 17/01/2019 |
| CINAHL         | Limiters - Date of publication: 20110101-20211231<br>Magnifiers - Apply Equivalent Subjects<br>Specify by SubjectMajor: - heart surgery<br>Specify by SubjectMajor: - intensive care units<br>Specify by Language: - english<br>Search Modes - Boolean/Phrase | TI intensive care units OR TI critical care AND TI electronic medical record OR TI computerized medical records OR TI clinical decision support systems OR TI Computerized physician order entry AND TI cardiogenic shock OR TI post cardiac OR TI cardiac surgery | 149 | 17/01/2019 |
